1 **Title:** What drives results in Bayesian morphological clock analyses?

2 **Authors:** Caroline Parins-Fukuchi<sup>1\*</sup> and Joseph W. Brown<sup>2</sup>

3 <sup>1</sup>Department of Ecology and Evolutionary Biology, University of Michigan, Ann Arbor,  
4 Michigan, USA

5 <sup>2</sup>Department of Animal and Plant Sciences, University of Sheffield, Sheffield, UK

6 \*Correspondence to: cfukuchi@umich.edu

7

8

9

10

11

12

13

14

15

16

17

18

19

20

21

22

23

24 **Abstract:**

25 Recently, approaches that estimate species divergence times using fossil taxa and models of  
26 morphological evolution have exploded in popularity. These methods incorporate diverse  
27 biological and geological information to inform posterior reconstructions, and have been applied  
28 to several high-profile clades to positive effect. However, there are important examples where  
29 morphological data are misleading, resulting in unrealistic age estimates. While several studies  
30 have demonstrated that these approaches can be robust and internally consistent, the causes and  
31 limitations of these patterns remain unclear. In this study, we dissect signal in Bayesian dating  
32 analyses of three mammalian clades. For two of the three examples, we find that morphological  
33 characters provide little information regarding divergence times as compared to geological range  
34 information, with posterior estimates largely recapitulating those recovered under the prior.  
35 However, in the cetacean dataset, we find that morphological data do appreciably inform  
36 posterior divergence time estimates. We supplement these empirical analyses with a set of  
37 simulations designed to explore the efficiency and limitations of binary and 3-state character data  
38 in reconstructing node ages. Our results demonstrate areas of both strength and weakness for  
39 morphological clock analyses, and help to outline conditions under which they perform best and,  
40 conversely, when they should be eschewed in favour of purely geological approaches.

41

42 **Keywords:** Morphological clock, tip-dating, Bayesian, divergence times, Mammalia

43

44

45

46

47 **Introduction:**

48 Divergence time studies that incorporate morphology and more extensive fossil  
49 information have exploded over the last decade. These have sought to improve the dramatic gap  
50 between molecular estimates of divergence times and the fossil record. By integrating  
51 combinations of fossil preservation, lineage diversification, and morphological models, these  
52 studies have yielded a deeper understanding of the capability of fossil data to inform  
53 phylogenetic relationships, the timing of major radiations, and evolutionary patterns between  
54 fossil and living taxa [1-6] .

55 In these approaches, discrete morphological data are analysed by calibrating substitution  
56 rates calculated under Markov substitution models and Poisson clock models to infer divergence  
57 times [1,2]. Models employed in these approaches may either assume a ‘strict’ clock, where rates  
58 remain constant across all lineages, or a ‘relaxed’ clock, where rates are allowed to across  
59 branches [7]. In current implementations, morphological clocks participate along with Bayesian  
60 tree priors to reconstruct posterior divergence times. The tree priors most commonly used are  
61 variations of ‘birth-death serial sampling’ (BDSS) models. These incorporate diversification and  
62 fossil sampling processes and often accommodate sequential sampling of ancestral taxa [3,5,8,9].  
63 The more thorough integration of geological information enabled through these priors, which  
64 may be represented by temporal occurrence ranges or point appearances, seems to increase the  
65 accuracy and internal consistency over previous morphological dating methods, and has  
66 contributed to a more complete understanding of the evolution of several major clades [5,6].  
67 Though total-evidence dating methods were originally developed to analyse fossil taxa alongside  
68 living taxa, they have been increasingly applied to exclusively palaeontological datasets, where  
69 they are used to infer divergence times from morphological data alone [10]. Palaeontologists also

70 frequently employ *a posteriori* time-scaling (APT) approaches that scale cladograms to time.  
71 These scale branches either directly to observed ranges [11,12] or model diversification and  
72 fossil preservation to estimate divergence times probabilistically [13]. The latter approach is a  
73 variant of the tree priors described above but differs by its exclusion of a morphological clock.

74         Despite the recent surge in popularity experienced by the many permutations of  
75 morphological clock approaches, there remain outstanding challenges in their use. Some of these  
76 are shared with molecular data, and others are unique to morphology. Complex interactions  
77 between fossil calibrations and other priors can create conflict, yielding results which are  
78 egregiously incorrect yet overly precise [14]. In a similar vein, the accuracy and precision of  
79 molecular and morphological clock estimates can be driven by prior choice and the reliability of  
80 the fossil record [15,16]. This raises questions about the degree to which character data  
81 contribute to posterior divergence time estimates relative to prior model choice and temporal  
82 information gleaned directly from fossils. This is especially important for morphological  
83 characters, for which complexities in evolutionary processes, errors stemming from character  
84 coding, and biases in sampling can create a mismatch between data and simple evolutionary  
85 models, potentially leading to unrealistic divergence time estimates [4]. These difficulties can  
86 result in imprecise, unrealistically ancient estimates that are only improved when constrained by  
87 strongly informative priors [17].

88         Results achieved from BDSS tip-dating can differ substantially from APT methods [18].  
89 These differences are unsettling given the lack of a theoretical basis from which to expect clock-  
90 like evolutionary patterns in morphology. While molecular dating can sometimes yield muddled  
91 results, these methods possess a strong theoretical grounding [19,20]. On the other hand, some  
92 datasets reveal striking congruence between geology and dates derived under BDSS methods

93 [10]. These observations beg question as to the conditions under which morphological clock  
94 approaches provide substantial information when combined with geological dating methods.

95 In this study, we examine the capability of morphological characters to inform  
96 divergence times. We examine this issue in a Bayesian context by dissecting the relative  
97 contribution of morphological clocks and prior information derived from complex models of  
98 speciation and fossil preservation to posterior divergence time estimates. In Bayesian analyses,  
99 characterising the extent to which prior beliefs contribute to posterior estimates can help isolate  
100 the contribution of information presented by new data [14,21]. We perform these comparisons  
101 using three morphological datasets representing canids, cetaceans, and hominins to compare  
102 posterior estimates to those estimated under geologically-informed priors alone. We supplement  
103 these examinations with a set of simulations designed to gauge the amount of character data  
104 needed to inform the ages of internal nodes in the absence of sampling bias and model  
105 misspecification.

106

## 107 **Materials and Methods:**

108 *Empirical datasets:* We obtained three empirical datasets from the literature containing  
109 morphological and geological range data in canids [10,22], hominins [23], and cetaceans [24].

110

111 *Divergence time estimation:* We estimated divergence times and topology using BEAST 2  
112 (version 2.4.7) [25] (Fig. 1). Topology was initially estimated using the full character and  
113 stratigraphic range datasets. In subsequent analyses that estimate ages using reduced and  
114 simulated datasets, topology was constrained to the initial result to make node age comparisons  
115 more straightforward. Tip dates were indicated as the most recent occurrence of each taxon in the

116 fossil record. Stratigraphic ranges were specified for all fossil taxa after [10], using first  
117 appearance dates (FAD) and last appearance dates (LAD) that were published along with the  
118 morphological matrices for all datasets.

119 For all three datasets, divergence times were estimated using an uncorrelated log-normal  
120 (UCLN) relaxed clock. We used the ‘Fossilized Birth-Death’ (FBD) prior deployed in the  
121 BEAST 2 ‘Sampled Ancestors’ package (version 1.1.7) [3,9]. Prior distributions for each  
122 parameter were chosen to be informative as follows. For the canid dataset, we retained the prior  
123 values used by [10] in their analysis. Diversification and extinction rate values were chosen in  
124 hominins to reflect the high extinction that is apparent in their fossil record. In the cetaceans,  
125 these priors were informed by previous diversification studies[26]. Example BEAST 2 control  
126 files are provided in the data supplement. Markov Chain Monte-Carlo (MCMC) simulations  
127 were run between 30 and 60 million generations. All runs were manually checked for  
128 convergence using Tracer v1.6 [27], and accepted when all logged parameters reached an  
129 effective sample size (ESS) of at least 200. To further examine the behaviour of mechanistic  
130 priors and morphological clocks on posterior ages, we uniformly increased the FAD of each  
131 temporal occurrence range used for the prior calculations in the cetacean dataset by 10 Ma. We  
132 then reconstructed ages using this altered geological information, following the same procedure  
133 as is described above.

134  
135 *Simulation.* To better explore the abilities and limitations of character data to inform divergence  
136 times in the absence of complicating factors such as model misspecification and sampling bias,  
137 we performed a small series of simulations. Using the tree estimated from the empirical cetacean  
138 matrix, we artificially increased the height of two nodes, one close to the present, and one nested

139 deeper within the tree (Fig. S1). This modified tree was used to simulate matrices of 1000  
140 characters. These characters were randomly subsampled into matrices of 10, 30, 70, and 500  
141 characters to examine the ability of character data to inform posterior ages at varying levels of  
142 abundance. To examine the effect of differing discrete character state space, we performed this  
143 test using binary and 3-state characters. Characters were all simulated under the Mk model of  
144 morphological evolution [28] using the ‘geiger’ R package [29] with clock-like rates across the  
145 tree. Matrices were generated using two different schemes of site-wise rate variability. One set  
146 was evolved along a single rate across all traits, and another using five separate rates. The multi-  
147 rate matrices were generated by concatenating five 200-character matrices evolved using distinct  
148 rates, and were randomly subsampled to yield the smaller datasets. R and Python scripts used for  
149 simulation are available in the data supplement. To ensure the informativeness of the simulated  
150 characters, trees were inferred from all matrices using RAxML version 8.2.11 [30] and visually  
151 checked for topological and branch length accuracy. We then inferred divergence times from the  
152 simulated matrices using BEAST 2, following a similar procedure as for the empirical datasets.  
153 However, since the characters were simulated to be clock-like, we inferred dates under a strict  
154 clock rather than a UCLN relaxed clock to avoid imprecision stemming from over-  
155 parameterization. All priors were the same as those for the empirical analyses. This enabled  
156 testing of the required number of characters needed to reconstruct the single altered internal node  
157 age when sampling is complete, and modelling assumptions are not violated.

158

## 159 **Results and Discussion:**

160 *How do morphological clocks drive posterior age estimates?* For the canid and hominin datasets,  
161 we find that posterior divergence times are not substantially different from those estimated from

162 the prior model alone (Fig. 2). This is the case when analysed using priors both with (Fig. 2a)  
163 and without (Fig. 2b) temporal ranges. There exist a small handful of deviations from this  
164 pattern, but nearly all residuals fall within 1 Ma of the identity line. 95% credibility intervals (CI)  
165 are wider when temporal ranges are included in the prior. Precision in both tip and internal node  
166 ages is slightly higher in posterior estimates compared to posterior. The weak influence of  
167 morphological data on posterior divergence time estimates may provide an explanation for the  
168 strong internal consistency found by [10] through cross validation (CV). In that study, the  
169 authors attribute their results to strong performance of the morphological clock. In their  
170 procedure, the authors estimated the age of fossils when geological information is removed from  
171 a single tip. Based upon our results, their procedure might be interpreted as testing the  
172 consistency of the FBD prior, rather than the morphological clock. The hominin matrix differs in  
173 that, when stratigraphic ranges are incorporated into the prior, morphological data push dates  
174 slightly older for nodes close to the present, but the disparity between prior and posterior  
175 estimates decreases toward the root (Fig. 2c). In the absence of stratigraphic information,  
176 posterior and prior mean ages align closely with one another (Fig. 2d). Thus, the extension of  
177 geological point occurrences to ranges appears to increase the amount of information extracted  
178 from morphological characters.

179 In contrast to the hominid and canid datasets, the cetacean morphological data pushed  
180 divergence times older than prior estimates. Prior mean node ages that incorporate temporal  
181 ranges (Fig. 2e) were older than those estimated without ranges (Fig. 2f). For both range-  
182 informed and range-uninformed priors, addition of morphological data increased mean ages by  
183 approximately 0-3 Ma across the tree. When the upper range of the geological ranges were  
184 altered to be 10 Ma older across all taxa, the posterior followed the prior. Posteriors estimated



185 under the altered priors exhibited a similar pattern to the analyses with unaltered priors, with  
186 posterior and prior ages differing by approximately 0-3 Ma across all nodes (Fig. S2). Since  
187 posterior estimates shifted in tandem with changes in priors, the relaxed morphological clock  
188 seemed to inform relative, rather than absolute, divergence times. Absolute divergence times  
189 were then made identifiable by geologically-informed priors.

190  
191 *Simulations.* We found that, overall, binary characters were less informative in divergence time  
192 reconstruction than trinary characters (Fig. 3). At nearly every matrix size and rate configuration,  
193 ages estimated from the 3-state characters were older and closer to the true node age compared to  
194 the binary characters. This was the case for both the shallow and deep nodes. The fewer number  
195 of states present in binary characters appears to result in decreased information. This is expected  
196 from Shannon information theory [31] where information content limits are determined by the  
197 size of the alphabet involved. Biologically, this result may be due to the greater propensity  
198 toward rapid saturation exhibited by binary characters, making it difficult to correctly estimate  
199 the number of changes undergone at each site. This suggests that, all things being equal,  
200 researchers should be cautious when interpreting divergence times estimated from matrices  
201 which are primarily composed of binary characters, as they have a greater propensity to  
202 underestimate true divergence times compared to characters with larger numbers of states.  
203 However, the binary portion of the empirical cetacean matrix appears to retain dating  
204 information. This may illustrate that the complexities in morphological evolution and character  
205 sampling may yield unpredictable results, complicating the ability to make general prescriptive  
206 statements. Nevertheless, combined with the empirical results described above, the weak patterns

207 observed in the simulations further underscore the importance in comparing priors and  
208 posteriors.

209

210 *Homoplasy, missing data, and information content.* Information content varies across  
211 these three matrices. While the cetacean matrix is intermediate in size, as compared to the other  
212 two, it differs in sampling completeness, statistical behaviour, and the distribution of  
213 substitutions across characters. These properties may have resulted in the increased information  
214 in the cetacean morphological matrix. The three datasets differ substantially in their respective  
215 proportions of missing data. The hominin matrix is the sparsest, with over half of sites missing  
216 for each taxon on average (Fig. 4a). Gappiness is distributed widely, ranging from ~20% to  
217 nearly all sites missing. The canid distribution possesses the lowest proportion of missing sites.  
218 The cetacean dataset is further distinguished from the hominin dataset in the tameness of its  
219 statistical behaviour. Relaxed clock parameter estimates show that the cetacean data were  
220 relatively clock-like compared to the other datasets (Table 1). The hominin matrix possesses  
221 much greater branch-wise rate heterogeneity, possessing nearly three times greater variability  
222 across branches in morphological rate compared to cetaceans. It is possible that this deviation  
223 from the morphological clock limits the amount of recoverable information about divergence  
224 times.

225 The cetacean matrix contains greater variability in the number of character changes  
226 across all characters (Fig. 4b). The comparatively large number of substitutions implied by the  
227 cetacean matrix may increase the chance of recovering a character change along any single  
228 branch, increasing the amount of information from which to condition the clock model. The  
229 canid and hominin datasets, on the other hand, have low homoplasy relative to the Bayesian

230 summary topology, a pattern that may be common to many cladistic morphological datasets.  
231 These patterns demonstrate opposing challenges in applying clock models to the analysis of  
232 existing morphological datasets. Although the canid and hominin data show patterns that suggest  
233 high *topological* information content, the conserved number of character changes limits the  
234 capability to inform divergence times. On the other hand, the higher entropy displayed by the  
235 cetacean matrix would be expected to provide clock models with more information (Fig. 4c).  
236 Thus, if information content is conceived using intersecting axes of character change count and  
237 completeness of character sampling, the cetacean dataset possesses the largest amount of  
238 information among these three datasets.

239         However, it is difficult to determine whether this added information is likely to result in  
240 increased accuracy in divergence time reconstructions. There is no empirical or theoretical  
241 expectation that morphological characters evolve concordantly to even relaxed clocks. Instead,  
242 certain lineages can be intensely biased toward rapid and major morphological rearrangement,  
243 while others may remain morphologically static [32]. As a result, the increased variation in  
244 pattern displayed by the cetacean dataset may reflect either accurately informative signal,  
245 random noise, or procedural bias in evolutionary change. Similarly, it is possible for even  
246 random data to inform divergence times, albeit inaccurately. These complications may be the  
247 fundamental source of the strongly misleading results generated during previous authors'  
248 attempts to apply morphological clocks to date the mammalian radiation [4,17]. The matrix used  
249 in these previous studies compiled a massive number of characters from widely different sources,  
250 likely resulting in extremely high entropy. Complex patterns and noise in these data may require  
251 unrealistic ancient dates in order to fit under a clock model. This interpretation is underscored by  
252 the wide behavioural disparity observed in each of our analyses. It is difficult to envision that

253 existing methods would be capable of recovering accurately informative signal from a  
254 hypothetical concatenated analysis of these three datasets. These problems highlight the  
255 difficulty in interpreting the accuracy of morphological clocks in reconstructing dates, even in  
256 apparently well-behaved datasets such as the cetaceans.

257  
258 *Rocks vs morphological clocks.* The results presented here demonstrate that geological data  
259 provide the most reliably accurate information for divergence time estimation. In the canid and  
260 hominin dataset, we find that morphological data are limited in their ability to inform divergence  
261 times, and so geological occurrences are a more reliable and consistent data source. The cetacean  
262 matrix more informs posterior divergence time estimates more substantially. However, our  
263 comparison of the results achieved under different priors demonstrates the crucial role of  
264 geological data in cases where accuracy and precision are needed when estimating absolute  
265 divergence times from morphological data. This is true even in cases where morphological data  
266 appear to be well sampled and behaved, such as is shown in the cetacean dataset.

267         In contrast to the geological data, the morphological matrices examined here expose  
268 limitations. The weakly informative canid and hominin morphology raises questions concerning  
269 the trade-offs in incorporating morphological data in divergence time estimation. Our study  
270 highlights several risks in the use of morphological clocks. In cases such as our canid analysis,  
271 where morphological data appear to behave consistently but are uninformative, analysis of  
272 morphological clocks in a Bayesian context may yield misleadingly high confidence that  
273 posterior dates reflect true speciation times. Although the simulations remove model  
274 misspecification and incomplete character sampling as a potential source of error, a relatively  
275 large number of characters are needed to substantially inform posterior estimates. Researchers

276 using these approaches should take extra caution to compare prior and posterior estimates to  
277 determine whether posterior signal originates from the data or the prior, a concern that involves  
278 molecular data as well [14]. Furthermore, difficulty in distinguishing between evolutionary  
279 signal and noise and lack of a theoretical expectation remains a source of substantial and  
280 fundamental underlying concern, even in cases where data seem internally consistent and well-  
281 behaved.

282 Our simulations yielded the insight that morphological clock methods to underestimate  
283 true divergence times, even at large matrix sizes. Since many morphological matrices contain  
284 only small numbers of characters, many datasets may be incapable of recovering true divergence  
285 times, even when egregious sampling biases and model violations are not present. Thus, dates  
286 recovered using from morphological clocks using even well-behaved empirical datasets should  
287 be interpreted cautiously. For example, although the empirical cetacean character matrix  
288 analysed here consistently results in date estimates that are several million years older than those  
289 recovered under the prior, it is possible that these dates still represent underestimates of true  
290 divergence times, and should therefore still be conservatively interpreted as minimum divergence  
291 times, similarly to typical treatments of geological estimates. This may also extend to previous  
292 studies which infer recent dates for radiations using total-evidence methods [6].

293  
294 *How can we move forward?* Our analyses demonstrate several challenges in recovering  
295 divergence times that are unique to morphological data. Many existing morphological datasets,  
296 including the canid and hominin matrices analysed here, are cladistically informative, but lack  
297 clock information. Other datasets may be more informative, but the lack of a theoretical  
298 expectation makes their interpretation unsettling. When reconstructing divergence for older

299 clades than examined here, these problems may occur simultaneously, yielding unpredictable  
300 results. We recommend that researchers approach morphological clock estimates with caution,  
301 and estimate dates from geological information alone when in doubt. The poor trade-offs  
302 demonstrated by morphological clock methods and dilemmas in the interpretation of their results  
303 suggests that their use should remain limited. New developments will continue the existing  
304 synthesis of neo- and palaeontological data within the framework encapsulated by existing  
305 approaches while generating unprecedented discoveries.

306

307 **Acknowledgements:** CPF and JWB would like to thank JF Walker and SA Smith for helpful  
308 comments that improved the manuscript.

309

310 **Data, code, and materials:** Scripts used for simulation, data processing, and statistical analyses  
311 can be accessed at [https://github.com/carolinetomo/mammalian\\_morphological\\_clocks](https://github.com/carolinetomo/mammalian_morphological_clocks).  
312 Example BEAST 2 control files are available on Dryad.

313

314 **Competing interests:** We have no competing interests.

315

316 **Author contributions:** CPF conceived of and designed the study, carried out dating analyses and  
317 simulation experiments, performed statistical analyses, and drafted the manuscript. JWB  
318 contributed to dating analyses, interpretation of results, and helped draft the manuscript.

319

320

321

322 **References:**

- 323 1. Pyron, R. A. 2011 Divergence time estimation using fossils as terminal taxa and the  
324 origins of Lissamphibia. *Syst. Biol.* **60**, 466–481. (doi:10.1093/sysbio/syr047)
- 325 2. Ronquist, F., Klopfstein, S., Vilhelmsen, L., Schulmeister, S., Murray, D. L. & Rasnitsyn, A.  
326 P. 2012 A total-evidence approach to dating with fossils, applied to the early radiation of  
327 the hymenoptera. *Syst. Biol.* **61**, 973–999. (doi:10.1093/sysbio/sys058)
- 328 3. Heath, T. A., Huelsenbeck, J. P. & Stadler, T. 2014 The fossilized birth-death process for  
329 coherent calibration of divergence-time estimates. *Proc. Natl. Acad. Sci. U.S.A.* **111**,  
330 E2957–66. (doi:10.1073/pnas.1319091111)
- 331 4. Beck, R. M. D. & Lee, M. S. Y. 2014 Ancient dates or accelerated rates? Morphological  
332 clocks and the antiquity of placental mammals. *Proc. Roy. Soc. B* **281**, 20141278–  
333 20141278. (doi:10.1098/rspb.2014.1278)
- 334 5. Zhang, C., Stadler, T., Klopfstein, S., Heath, T. A. & Ronquist, F. 2016 Total-Evidence  
335 Dating under the Fossilized Birth-Death Process. *Syst. Biol.* **65**, 228–249.  
336 (doi:10.1093/sysbio/syv080)
- 337 6. Gavryushkina, A., Heath, T. A., Ksepka, D. T., Stadler, T., Welch, D. & Drummond, A. J.  
338 2017 Bayesian Total-Evidence Dating Reveals the Recent Crown Radiation of Penguins.  
339 *Syst. Biol.* **66**, 57–73. (doi:10.1093/sysbio/syw060)
- 340 7. Drummond, A. J., Ho, S. Y. W., Phillips, M. J. & Rambaut, A. 2006 Relaxed Phylogenetics  
341 and Dating with Confidence. *PLoS Biology* **4**, e88. (doi:10.1371/journal.pbio.0040088)
- 342 8. Stadler, T. 2010 Sampling-through-time in birth–death trees. *Journal of Theoretical*  
343 *Biology* **267**, 396–404. (doi:10.1016/j.jtbi.2010.09.010)
- 344 9. Gavryushkina, A., Welch, D., Stadler, T. & Drummond, A. J. 2014 Bayesian inference of  
345 sampled ancestor trees for epidemiology and fossil calibration. *PLoS Comput. Biol.* **10**,  
346 e1003919. (doi:10.1371/journal.pcbi.1003919)
- 347 10. Drummond, A. J. & Stadler, T. 2016 Bayesian phylogenetic estimation of fossil ages.  
348 *Philos. Trans. R. Soc. Lond., B, Biol. Sci.* **371**, 20150129. (doi:10.1098/rstb.2015.0129)
- 349 11. Clyde, W. C. & Fisher, D. C. 1997 Comparing the fit of stratigraphic and morphologic data  
350 in phylogenetic analysis. *Paleobiology* **23**, 1–19. (doi:10.1017/s0094837300016614)
- 351 12. Huelsenbeck, J. P. & Rannala, B. 1997 Maximum Likelihood Estimation of Phylogeny  
352 Using Stratigraphic Data. *Paleobiology* **23**, 174–180. (doi:10.2307/2401051?ref=search-  
353 gateway:0a54a52430893d9e4bc5fd3ff569737a)
- 354 13. Bapst, D. W. 2013 A stochastic rate-calibrated method for time-scaling phylogenies of

- 355 fossil taxa. *Methods in Ecology and Evolution* **4**, 724–733. (doi:10.1111/2041-  
356 210X.12081)
- 357 14. Brown, J. W. & Smith, S. A. 2017 The Past Sure Is Tense: On Interpreting Phylogenetic  
358 Divergence Time Estimates. *Syst. Biol.* (doi:10.1093/sysbio/syx074)
- 359 15. Condamine, F. L., Nagalingum, N. S., Marshall, C. R. & Morlon, H. 2015 Origin and  
360 diversification of living cycads: a cautionary tale on the impact of the branching process  
361 prior in Bayesian molecular dating. *BMC Evol. Biol.* **15**, 65. (doi:10.1186/s12862-015-  
362 0347-8)
- 363 16. Warnock, R. C. M., Yang, Z. & Donoghue, P. C. J. 2017 Testing the molecular clock using  
364 mechanistic models of fossil preservation and molecular evolution. *Proc. Roy. Soc. B* **284**,  
365 20170227. (doi:10.1098/rspb.2017.0227)
- 366 17. Ronquist, F., Lartillot, N. & Phillips, M. J. 2016 Closing the gap between rocks and clocks  
367 using total-evidence dating. *Philos. Trans. R. Soc. Lond., B, Biol. Sci.* **371**, 20150136.  
368 (doi:10.1098/rstb.2015.0136)
- 369 18. Bapst, D. W., Wright, A. M., Matzke, N. J. & Lloyd, G. T. 2016 Topology, divergence dates,  
370 and macroevolutionary inferences vary between different tip-dating approaches applied  
371 to fossil theropods (Dinosauria). *Biol. Lett.* **12**, 20160237. (doi:10.1098/rsbl.2016.0237)
- 372 19. Kimura, M. 1968 Evolutionary Rate at the Molecular Level. *Nature* **217**, 624–626.  
373 (doi:10.1038/217624a0)
- 374 20. Kimura, M. & Ohta, T. 1974 On Some Principles Governing Molecular Evolution. *Proc.*  
375 *Natl. Acad. Sci. U.S.A.* **71**, 2848–2852. (doi:10.1073/pnas.71.7.2848)
- 376 21. Lewis, P. O., Chen, M.-H., Kuo, L., Lewis, L. A., Fučíková, K., Neupane, S., Wang, Y.-B. &  
377 Shi, D. 2016 Estimating Bayesian Phylogenetic Information Content. *Syst. Biol.* **65**, 1009–  
378 1023. (doi:10.1093/sysbio/syw042)
- 379 22. Slater, G. J. 2015 Iterative adaptive radiations of fossil canids show no evidence for  
380 diversity-dependent trait evolution. *Proc. Natl. Acad. Sci. U.S.A.* **112**, 4897–4902.  
381 (doi:10.1073/pnas.1403666111)
- 382 23. Dembo, M., Matzke, N. J., Mooers, A. Ø. & Collard, M. 2015 Bayesian analysis of a  
383 morphological supermatrix sheds light on controversial fossil hominin relationships. *Proc.*  
384 *Roy. Soc. B* **282**, 20150943. (doi:10.1098/rspb.2015.0943)
- 385 24. Geisler, J. H., McGowen, M. R., Yang, G. & Gatesy, J. 2011 A supermatrix analysis of  
386 genomic, morphological, and paleontological data from crown Cetacea. *BMC Evol. Biol.*  
387 **11**, 112. (doi:10.1186/1471-2148-11-112)
- 388 25. Bouckaert, R., Heled, J., Kühnert, D., Vaughan, T., Wu, C.-H., Xie, D., Suchard, M. A.,



- 389 Rambaut, A. & Drummond, A. J. 2014 BEAST 2: a software platform for Bayesian  
390 evolutionary analysis. *PLoS Comput. Biol.* **10**, e1003537.  
391 (doi:10.1371/journal.pcbi.1003537)
- 392 26. Slater, G. J., Price, S. A., Santini, F. & Alfaro, M. E. 2010 Diversity versus disparity and the  
393 radiation of modern cetaceans. *Proc. Roy. Soc. B* **277**, 3097–3104.  
394 (doi:10.1098/rspb.2010.0408)
- 395 27. Rambaut, A., Suchard, M. A., Xie, D. & Drummond, A. J. In press. Tracer v1.6.
- 396 28. Lewis, P. O. 2001 A Likelihood Approach to Estimating Phylogeny from Discrete  
397 Morphological Character Data. *Syst. Biol.* **50**, 913–925.  
398 (doi:10.1080/106351501753462876)
- 399 29. Pennell, M. W., Eastman, J. M., Slater, G. J., Brown, J. W., Uyeda, J. C., FitzJohn, R. G.,  
400 Alfaro, M. E. & Harmon, L. J. 2014 geiger v2.0: an expanded suite of methods for fitting  
401 macroevolutionary models to phylogenetic trees. *Bioinformatics* **30**, 2216–2218.  
402 (doi:10.1093/bioinformatics/btu181)
- 403 30. Stamatakis, A. 2014 RAxML version 8: a tool for phylogenetic analysis and post-analysis  
404 of large phylogenies. *Bioinformatics* **30**, 1312–1313. (doi:10.1093/bioinformatics/btu033)
- 405 31. Shannon, C. E. 1948 A Mathematical Theory of Communication. *Bell System Technical*  
406 *Journal* **27**, 623–656. (doi:10.1002/j.1538-7305.1948.tb00917.x)
- 407 32. Simpson, G. G. 1944 *Tempo and Mode in Evolution*. New York: Columbia University Press.

408

409

410 **Tables and Figures:**

| Dataset   | Mean (Ucld.mean) | Variance (Ucld.stdev) |
|-----------|------------------|-----------------------|
| Canids    | 0.09426          | 1.163                 |
| Cetaceans | 0.04184          | 0.509                 |
| Hominins  | 2.125            | 1.56                  |

411

412 **Table 1.** Mean rates and variance estimated under the Uncorrelated Lognormal (UCLN) model.

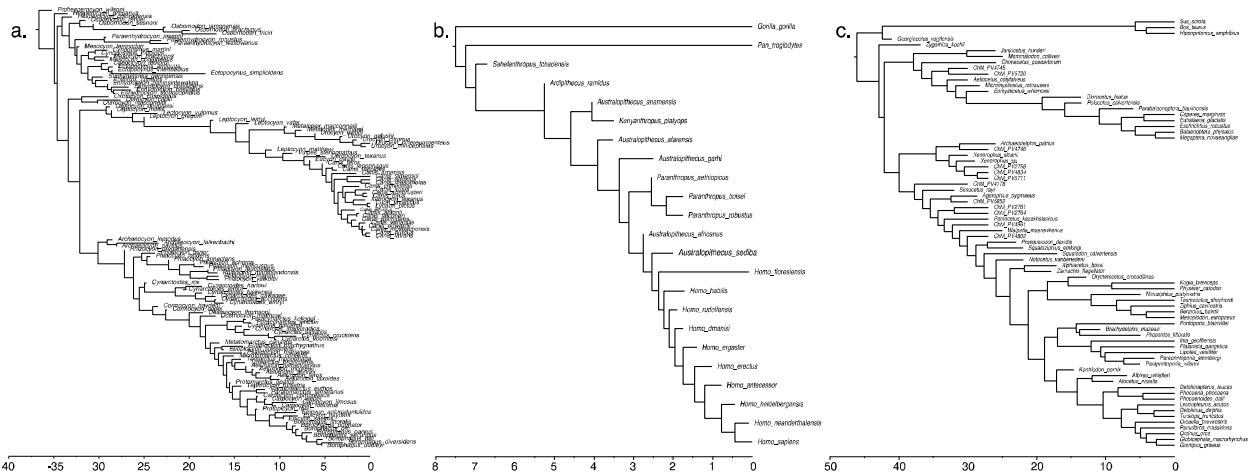

413

414 **Figure 1.** Maximum clade credibility posterior reconstructions of topology and divergence times

415 in a) canids, b) hominins, and c) cetaceans. The Fossilized Birth-Death parameters were

416 calibrated using stratigraphic ranges of the fossil tips.

417

418

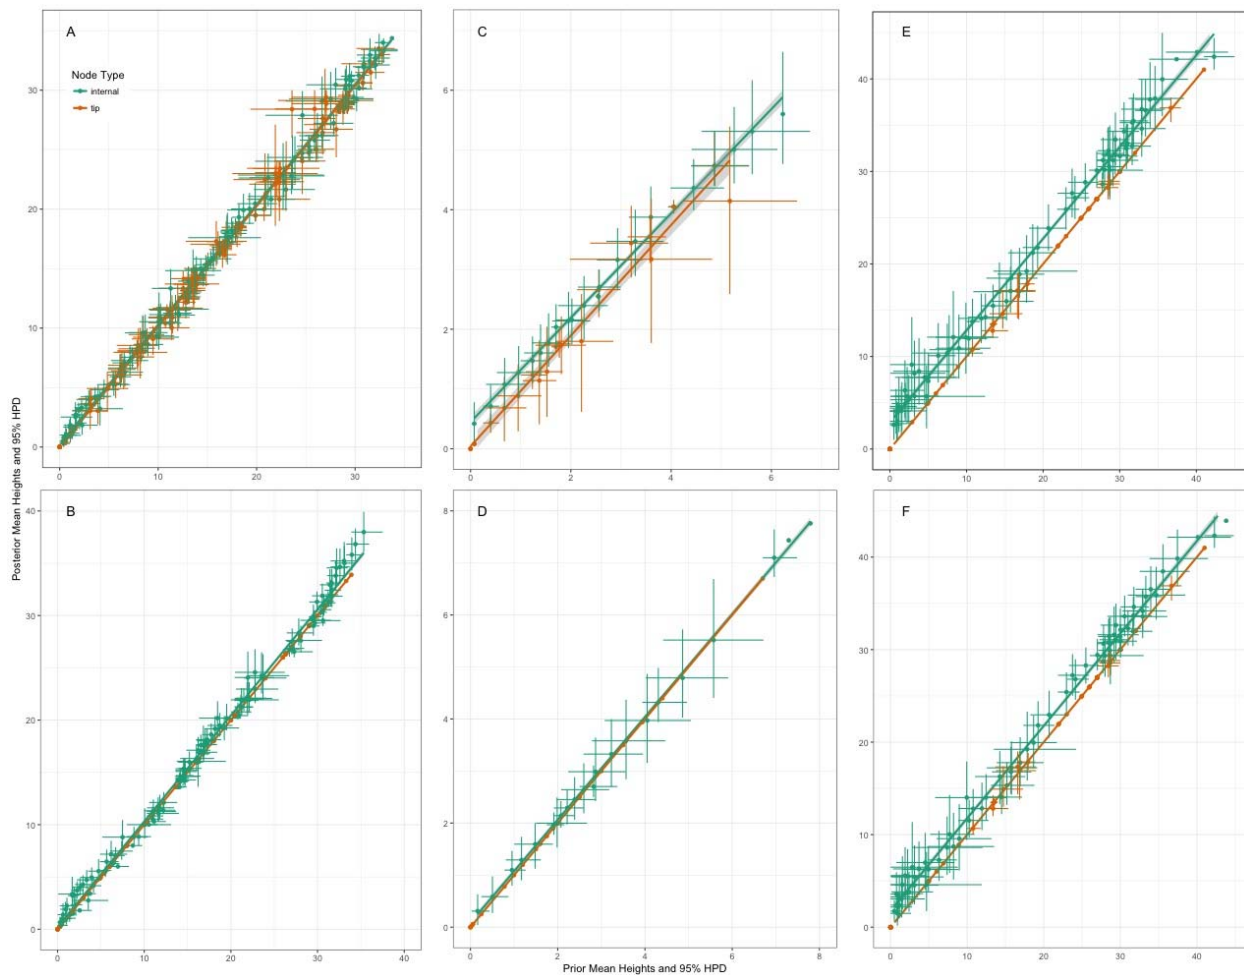

419

420 **Figure 2.** A,B) Canid prior and posterior node ages. Node heights reconstructed with A) full  
421 stratigraphic ranges for fossil tips and B) without full stratigraphic ranges. When ranges were  
422 not used, tip calibrations were added as the LAD of the ranges. C,D) hominin prior and posterior  
423 node ages reconstructed C) with and D) without stratigraphic ranges. E,F) cetacean prior and  
424 posterior node ages reconstructed E) with and F) without stratigraphic ranges.

425

426

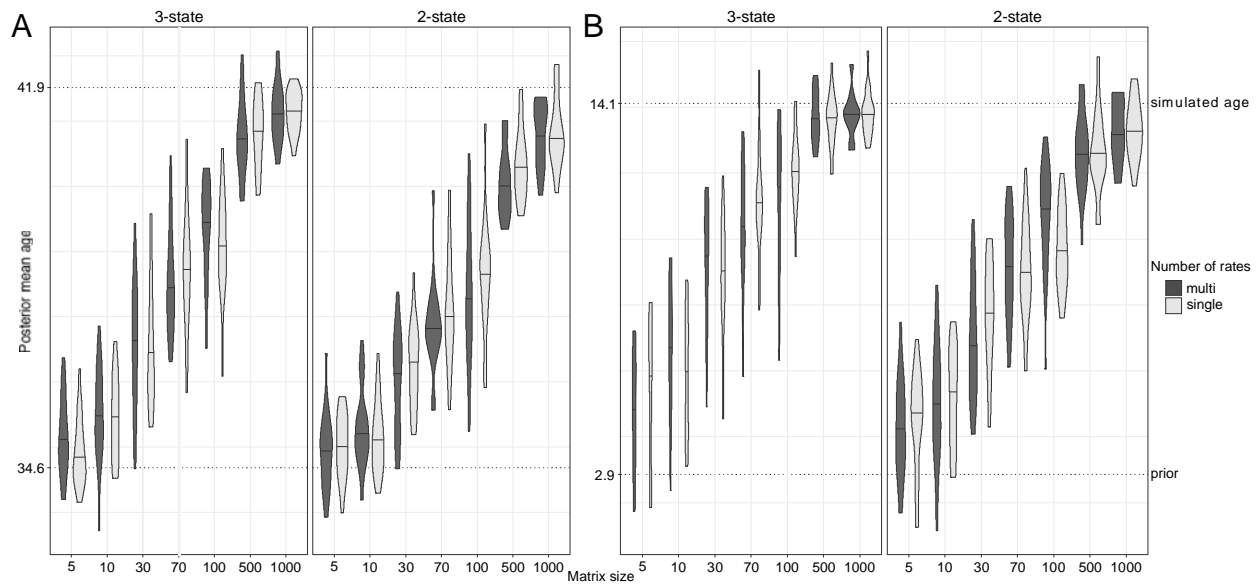

427

428 **Figure 3.** Comparison between “true” simulated ages, and mean ages reconstructed from

429 simulated data. A) reconstructions for the deep node shown in figure 2. B) shallow node

430 reconstructions. Plots are subdivided by the state space of the data matrix. Violin plots

431 are coloured by number of rates simulated within each dataset. Comparisons were

432 performed between datasets simulated under a single rate, and under multiple randomly

433 selected rate categories. Dotted lines indicate the ages the data were simulated under

434 (upper) and ages recovered under the prior alone (lower).

435

436

437

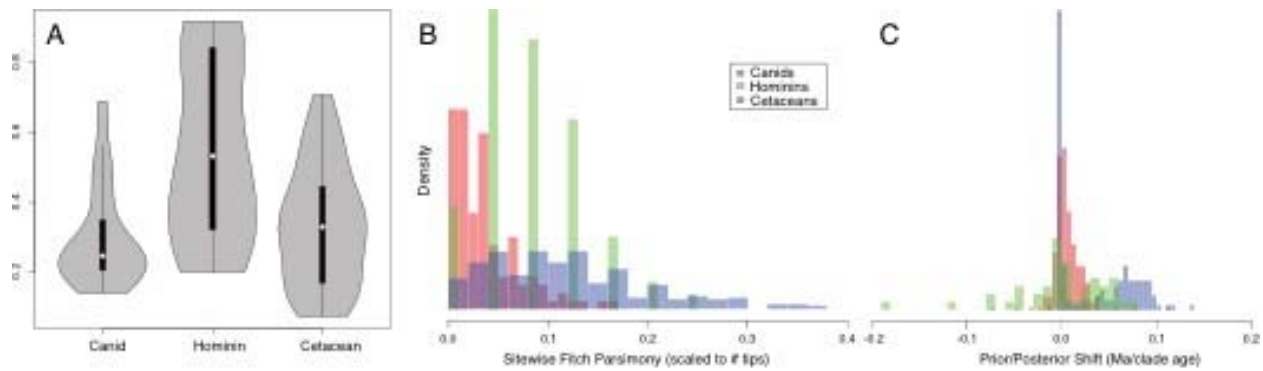

438

439 **Figure 4.** A) Proportion of missing characters for each taxon across each dataset. B) Distribution

440 of number of parsimony changes across sites for each dataset. These values are scaled to

441 the number of tips represented in each matrix. C) Distribution of shift between prior and

442 posterior mean node age estimates. Values were calculated by subtracting posterior

443 from prior heights and scaling the values to the overall depth of the tree. Histograms

444 represent the density rather than raw frequency counts.

445

446

447

448

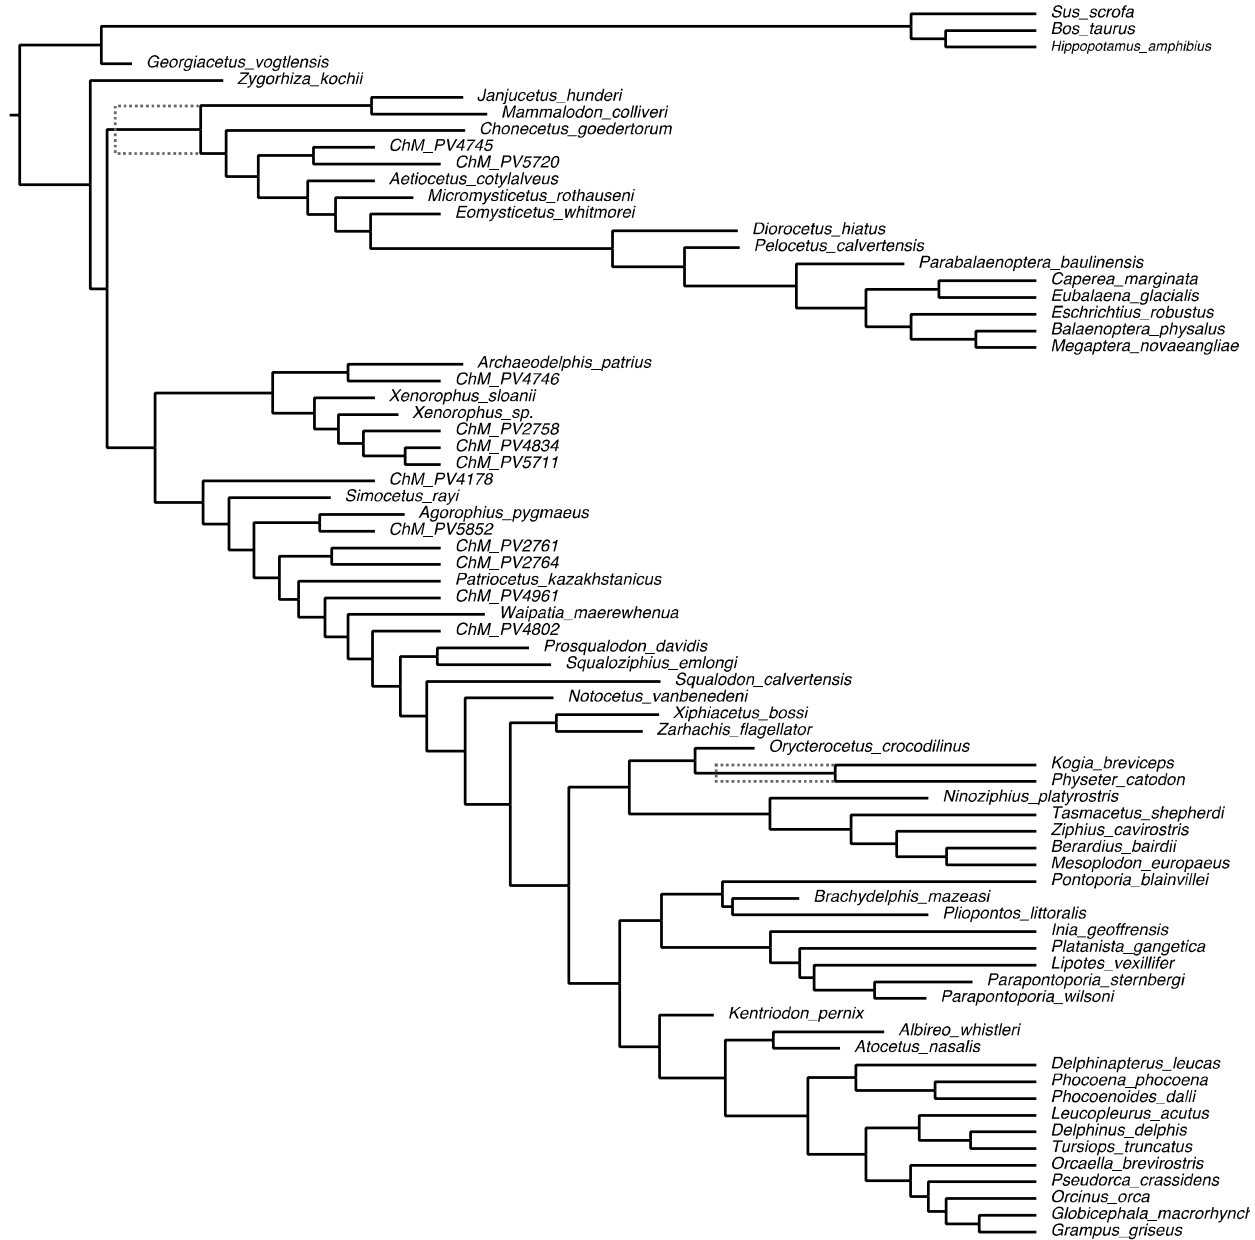

449

450 **Figure S1.** Nodes altered for simulations. Grey dotted lines show altered node heights.

451

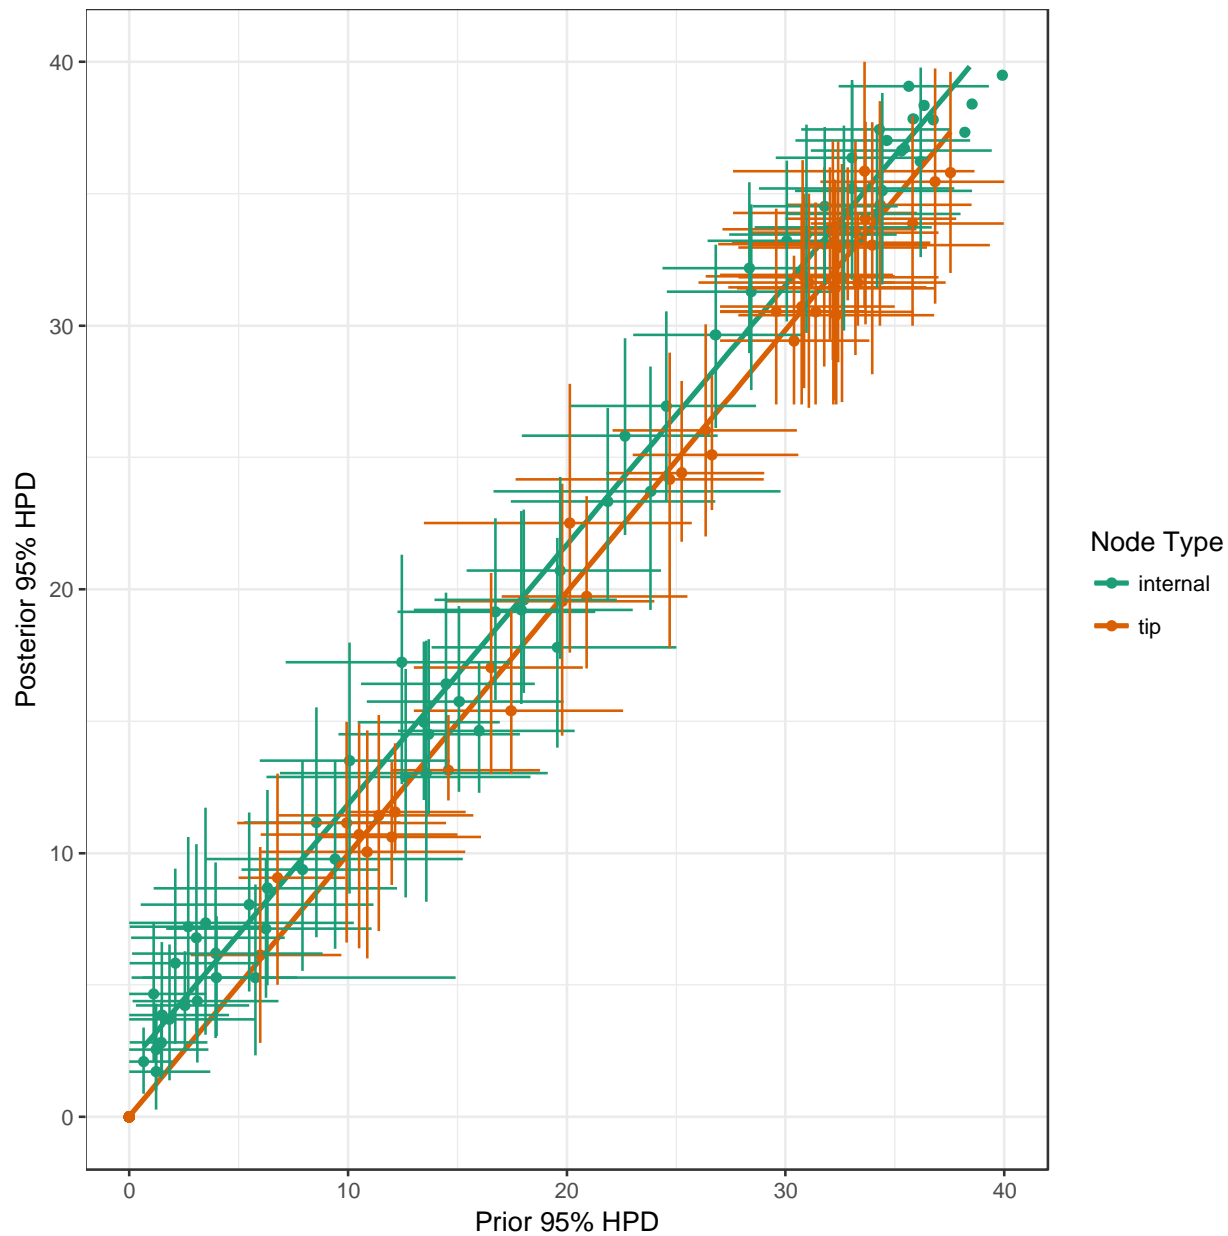

452

453 **Figure S2.** Prior and posterior mean age reconstructions with all FADs altered to be 10 Ma

454 older.
